# Supplementary material for: Soft X-ray signatures of cationic manganese–oxo systems, including a high-spin manganese(v) complex
Source: Royal Society of Chemistry journal article supplement (doi:10.1039/d1cp03667j), 2022-01-01
Supplement: d1cp03667j1.pdf [file d1cp03667j1.pdf]

## Supplementary information: Soft x-ray signatures of ionic manganese-oxo systems, including a high-spin manganese(V) complex

Mickaël G. Delcey, Rebecka Lindblad, Martin Timm, Christine Bülow, Vicente Zamudio-Bayer, Bernd von Issendorff, Tobias Lau, and Marcus Lundberg

### 1 Computational settings

Table 1: Additional details about the RAS simulations by molecule and valence state, including the number of core excited states, energy shifts and relative intensity scaling (RIS) for theoretical spectra to match experiment, and the similarity between theoretical and experimental spectra from the weighted cross-correlation function.

| Molecule and state                                        | K-edge       |            |      |            | L-edge              |            |      |            |
|-----------------------------------------------------------|--------------|------------|------|------------|---------------------|------------|------|------------|
|                                                           | Nr of states | Shift (eV) | RIS  | Similarity | Nr of states        | Shift (eV) | RIS  | Similarity |
| MnO <sup>+</sup> <sup>5</sup> Π                           | 60x4 = 240   | -0.860     | 1    | 0.992      | 130x4x2+40x4 = 1200 | -1.908     | 1    | 0.999      |
| MnO <sup>+</sup> <sup>5</sup> Σ                           | 60x4 = 240   | -0.980     | 1.09 | 0.881      | 100x4x2+3x3 = 809   | -1.770     | 1.03 | 0.993      |
| MnO <sub>2</sub> <sup>+</sup> <sup>3</sup> B <sub>1</sub> | 60x4 = 240   | -0.384     | 1    | 0.998      | 120x4x3 = 1440      | -1.606     | 1    | 0.996      |
| MnO <sub>2</sub> <sup>+</sup> <sup>1</sup> B <sub>1</sub> | 60x4 = 240   | -0.816     | 0.96 | 0.995      | 120x4x2 = 960       | -1.794     | 1.08 | 0.990      |
| MnO <sub>3</sub> <sup>+</sup> <sup>1</sup> A <sub>1</sub> | 60x2 = 120   | -1.480     | 1    | 0.991      |                     |            |      |            |

### 2 Additional information on theoretical geometric and electronic structures

Table 2: Mulliken charge populations for all complexes and electronic states.

| Molecule                             | Geometry                                                          | State                       | Charges |         |                |
|--------------------------------------|-------------------------------------------------------------------|-----------------------------|---------|---------|----------------|
|                                      |                                                                   |                             | Mn      | O (oxo) | O <sub>2</sub> |
| MnO <sup>+</sup>                     | Linear C <sub>∞</sub>                                             | <sup>5</sup> Π              | 1.42    | -0.42   |                |
|                                      |                                                                   | <sup>5</sup> Σ <sup>+</sup> | 1.55    | -0.55   |                |
|                                      |                                                                   | <sup>7</sup> Π              | 1.49    | -0.49   |                |
| MnO <sub>2</sub> <sup>+</sup>        | Bent C <sub>2v</sub>                                              | <sup>3</sup> B <sub>1</sub> | 1.58    | -0.29   |                |
|                                      |                                                                   | <sup>1</sup> B <sub>1</sub> | 1.53    | -0.26   |                |
| MnO <sub>3</sub> <sup>+</sup>        | Pyramidal C <sub>3v</sub><br>side-on superoxo C <sub>s</sub>      | <sup>1</sup> A <sub>1</sub> | 1.54    | -0.18   |                |
|                                      |                                                                   | <sup>3</sup> A'             | 1.47    | -0.56   | 0.09           |
|                                      | Pyramidal C <sub>3v</sub><br>end-on O <sub>2</sub> C <sub>s</sub> | <sup>3</sup> A <sub>2</sub> | 1.52    | -0.17   |                |
|                                      |                                                                   | <sup>1</sup> A <sub>2</sub> | 1.52    | -0.17   |                |
| MnO <sub>4</sub> <sup>+</sup>        | side-on superoxo C <sub>2v</sub>                                  | <sup>3</sup> A''            | 1.49    | -0.47   | -0.02          |
|                                      |                                                                   | <sup>1</sup> A <sub>2</sub> | 1.51    | -0.29   | 0.06           |
|                                      | peroxo-superoxo C <sub>2v</sub>                                   | <sup>3</sup> A <sub>2</sub> | 1.51    | -0.29   | 0.06           |
|                                      |                                                                   | <sup>3</sup> A <sub>1</sub> | 1.44    |         | 0.07/-0.50     |
| end-on O <sub>2</sub> C <sub>s</sub> | <sup>1</sup> A''                                                  | 1.55                        | -0.34   | 0.12    |                |
|                                      | <sup>3</sup> A''                                                  | 1.57                        | -0.35   | 0.13    |                |
| MnO                                  | Linear C <sub>∞</sub>                                             | <sup>6</sup> Σ <sup>+</sup> | 0.77    | -0.77   |                |
| MnO <sup>2+</sup>                    | Linear C <sub>∞</sub>                                             | <sup>4</sup> Σ <sup>-</sup> | 1.81    | 0.19    |                |
| MnO <sub>2</sub>                     | Bent C <sub>2v</sub>                                              | <sup>4</sup> B <sub>2</sub> | 1.36    | -0.68   |                |

Table 3: Geometric parameters for all complexes and electronic states.

| Molecule                       | Structure                   | Mn-O (Å) | O-Mn-O (°) | Mn-OO (Å)   | O-O(Å)      | Mn-O-O(°) |
|--------------------------------|-----------------------------|----------|------------|-------------|-------------|-----------|
| MnO <sup>+</sup>               | <sup>5</sup> Π              | 1.675    |            |             |             |           |
|                                | <sup>5</sup> Σ              | 1.593    |            |             |             |           |
|                                | <sup>7</sup> Π              | 1.841    |            |             |             |           |
| MnO <sub>2</sub> <sup>+</sup>  | <sup>3</sup> B <sub>1</sub> | 1.584    | 119.6      |             |             |           |
|                                | <sup>1</sup> B <sub>1</sub> | 1.570    | 117.6      |             |             |           |
| MnO <sub>3</sub> <sup>+</sup>  | <sup>1</sup> A <sub>1</sub> | 1.610    | 118.8      |             |             |           |
|                                | <sup>3</sup> A'             | 1.615    | 146.0      | 1.899       | 1.306       | 69.9      |
|                                | <sup>3</sup> A <sub>2</sub> | 1.618    | 113.0      |             |             |           |
|                                | <sup>1</sup> A <sub>2</sub> | 1.623    | 116.1      |             |             |           |
|                                | <sup>3</sup> A''            | 1.721    | 160.8      | 2.055       | 1.218       | 155.8     |
| MnO <sub>4</sub> <sup>+</sup>  | <sup>1</sup> A <sub>2</sub> | 1.523    | 119.3      | 1.864       | 1.255       | 70.3      |
|                                | <sup>3</sup> A <sub>2</sub> | 1.523    | 119.3      | 1.866       | 1.254       | 70.4      |
|                                | <sup>3</sup> A <sub>1</sub> |          |            | 1.900/1.770 | 1.258/1.388 | 70.7/66.9 |
|                                | <sup>1</sup> A''            | 1.544    | 119.9      | 1.969       | 1.200       | 151.9     |
|                                | <sup>3</sup> A''            | 1.544    | 119.9      | 1.969       | 1.200       | 151.9     |
| MnO                            | <sup>6</sup> Σ <sup>+</sup> | 1.622    |            |             |             |           |
| MnO <sub>2</sub> <sup>2+</sup> | <sup>4</sup> Σ <sup>-</sup> | 2.120    |            |             |             |           |
| MnO <sub>2</sub>               | <sup>4</sup> B <sub>2</sub> | 1.639    | 118.4      |             |             |           |

### 3 Convergence of spectra with theoretical parameters

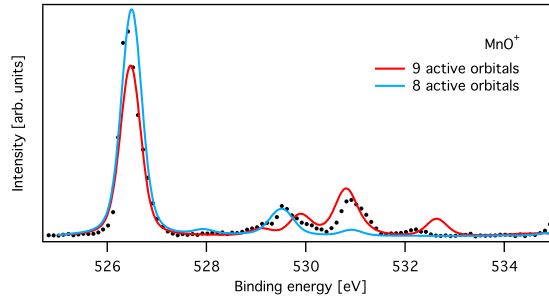

Figure S1: Theoretical oxygen K-edge XAS spectra of [MnO]<sup>+</sup> with 8 or 9 active orbitals.

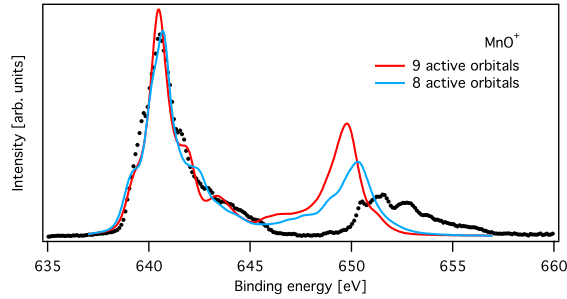

Figure S2: Theoretical manganese L-edge XAS spectra of [MnO]<sup>+</sup> with 8 or 9 active orbitals.

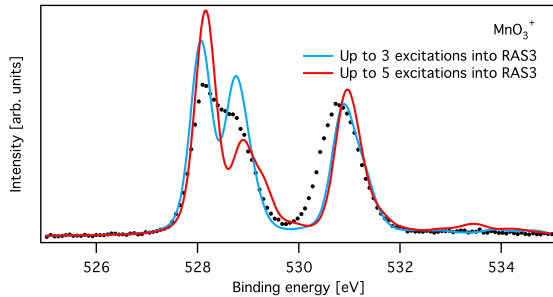

Figure S3: Theoretical oxygen K-edge XAS spectra of  $[\text{MnO}_3]^+$  with 3 or 5 excitations into the RAS3 space. The alignment difference between 3 and 5 excitations is 0.32 eV.

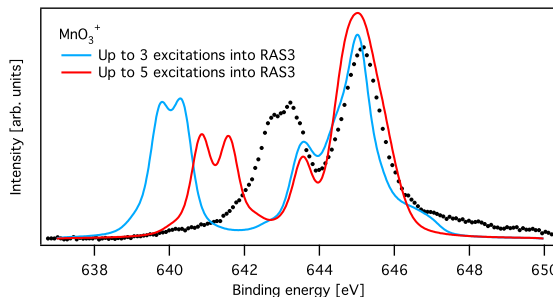

Figure S4: Theoretical manganese L-edge XAS spectra of  $[\text{MnO}_3]^+$  with 3 or 5 excitations into the RAS3 space. The alignment difference between 3 and 5 excitations is 2.92 eV.

## 4 Comparison of oxygen K-edge positions

The O K-edge absorption onsets, plotted versus the number of oxygen atoms, are given in Figure S5. The first observation is that the relative onset positions strongly depend on the measure used to assign it. Second, there is no clear correlation between onset position and the formal oxidation state of oxygen. Considering the partial electron transfer from oxygen to Mn in  $\text{MnO}^+$ , and the presence of  $\text{O}_2$ -species in  $[\text{MnO}_4]^+$ , the average oxidation states of these two should be higher than for the other complexes. Still, their onset positions are at opposite ends of the comparison. Another potential correlation would be with the manganese oxidation state because the probed unoccupied orbitals are formally metal levels. This is only true because most oxygens are oxo, which do not have any formally empty valence levels. Yet, while this hypothesis could possibly justify the shift between  $\text{MnO}^+$  and  $\text{MnO}_2^+$ , it cannot explain the shifts or lack thereof between the other three complexes.

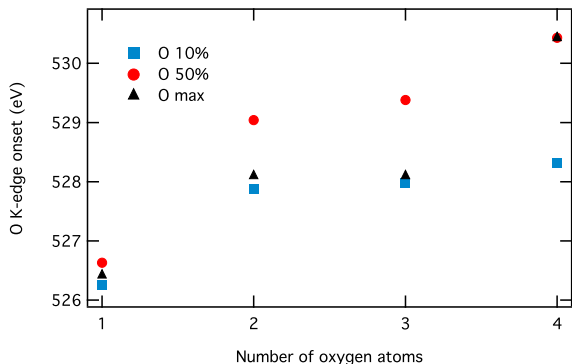

Figure S5: Experimental O K-edge absorption onsets plotted versus the number of oxygen atoms in  $[\text{MnO}_n]^+$  ( $n=1-4$ ). The onset positions have been calculated according to three different measures: 10% (resp 50%) refer to the energy at which the accumulated intensity reaches 10% (resp 50%) of the integrated intensity up to 534 eV, while max refers to the energy of the edge maximum.

## 5 Theoretical MnO-MnO<sup>2+</sup> series

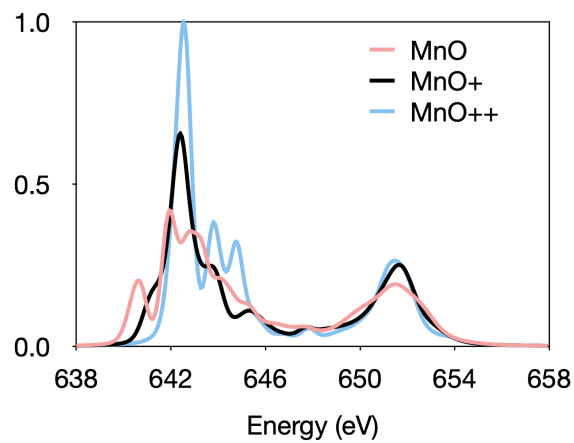

Figure S6: Calculated L-edge XAS spectra of MnO to MnO<sup>2+</sup> at their relaxed geometries. The relative shift of MnO<sup>+</sup> and MnO<sup>2+</sup> compared to MnO are respectively 0.4 eV and 0.53 eV using the maximum edge position and -0.26 eV and -0.2 eV using the median.
